# Supplementary material for: Biomolecular Evaluation of Lavandula stoechas L. for Nootropic Activity
Source: MDPI journal article supplement (doi:10.3390/plants10061259), 2021-06-21
Supplement: s1 [file s1]

Article

# Biomolecular Evaluation of *Lavandula stoechas* L. for Nootropic Activity

Aamir Mushtaq <sup>1,2</sup>, Rukhsana Anwar <sup>1</sup>, Umar Farooq Gohar <sup>3</sup>, Mobasher Ahmad <sup>1,2</sup>, Marc Romina Alina <sup>4,\*</sup>, Muresan Crina Carmen <sup>4</sup>, Marius Irimie <sup>5,\*</sup> and Elena Bobescu <sup>5</sup>

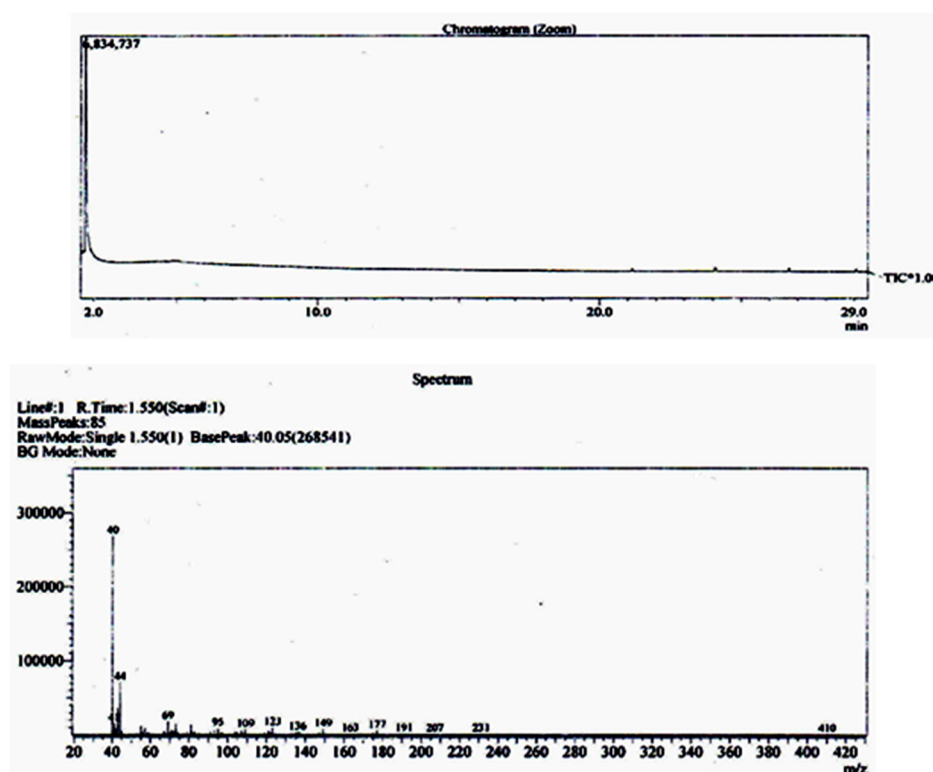

Figure S1. Spectrum of analysis of AfL.s by GC-MS.
